# Supplementary material
Source: Springer Nature journal article supplement (https://www.springermedizin.de/resource/supplementary/12888_2012_1140_MOESM2_ESM.pdf/9479292)

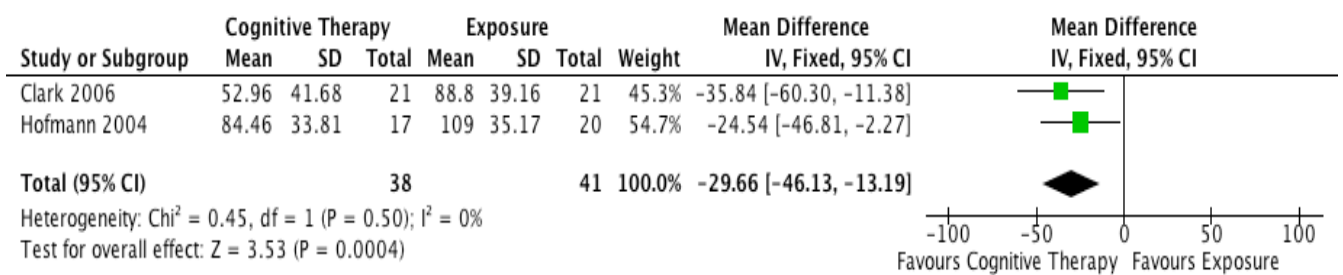

Supplement: MOESM2 [file 9479292]
